# Supplementary material for: The subtle effects of iron-containing metal surfaces on the reductive carbonylation of RuCl3
Source: Royal Society of Chemistry journal article supplement (doi:10.1039/b602834a), 2006-01-01
Supplement: b602834a.pdf [file b602834a.pdf]

**Electronic Supplementary Information for:**

**Subtle Effects of Iron-Containing Metal Surfaces on the Reductive  
Carbonylation of RuCl<sub>3</sub>.**

Matti Haukka, Minna Jakonen, Taina Nivajärvi, Mirja Kallinen

University of Joensuu, Department of Chemistry, P.O. Box 111, FI-80101, Joensuu, Finland

**Figures 1-4:** Thermal ellipsoid plots (at 50 % probability level) of **1b**, **1c**, **2**, and **3**.

Figure 1.

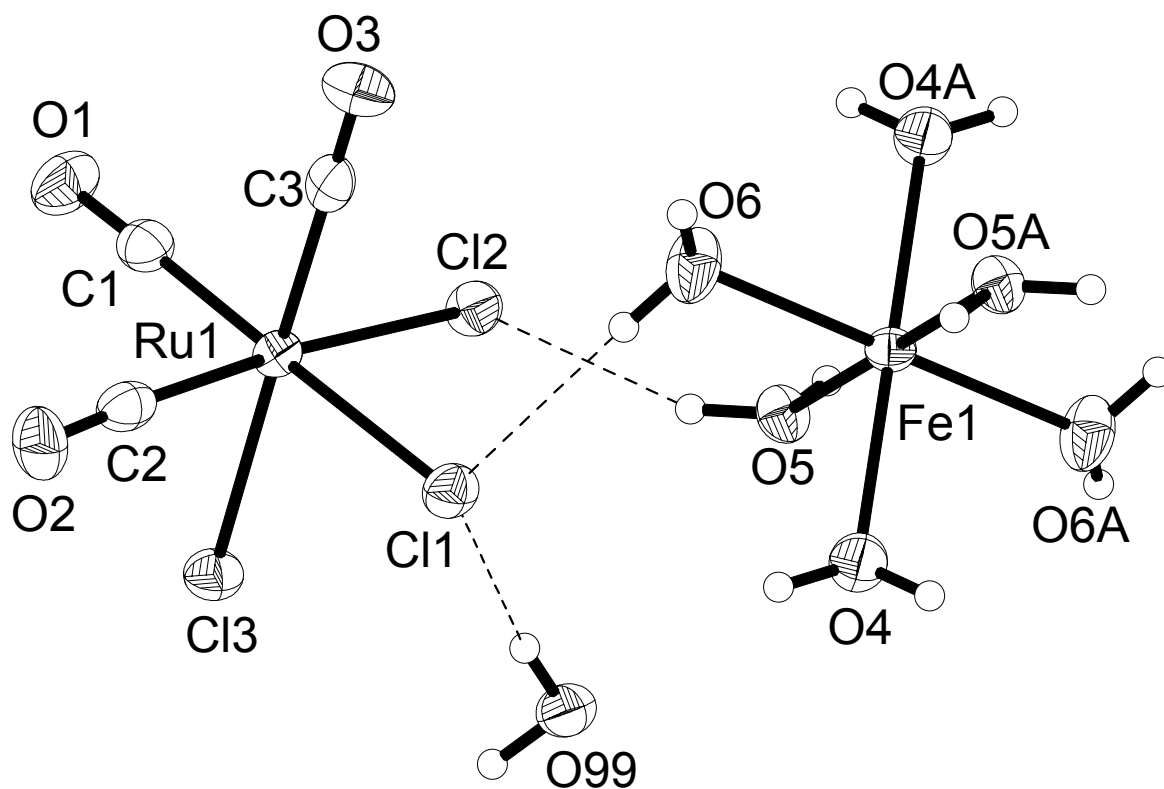

Thermal ellipsoid plot of **1b**. The symmetry related second  $[\text{RuCl}_3(\text{CO})_3]$ -unit and another water molecule has been omitted.

**Figure 2.**

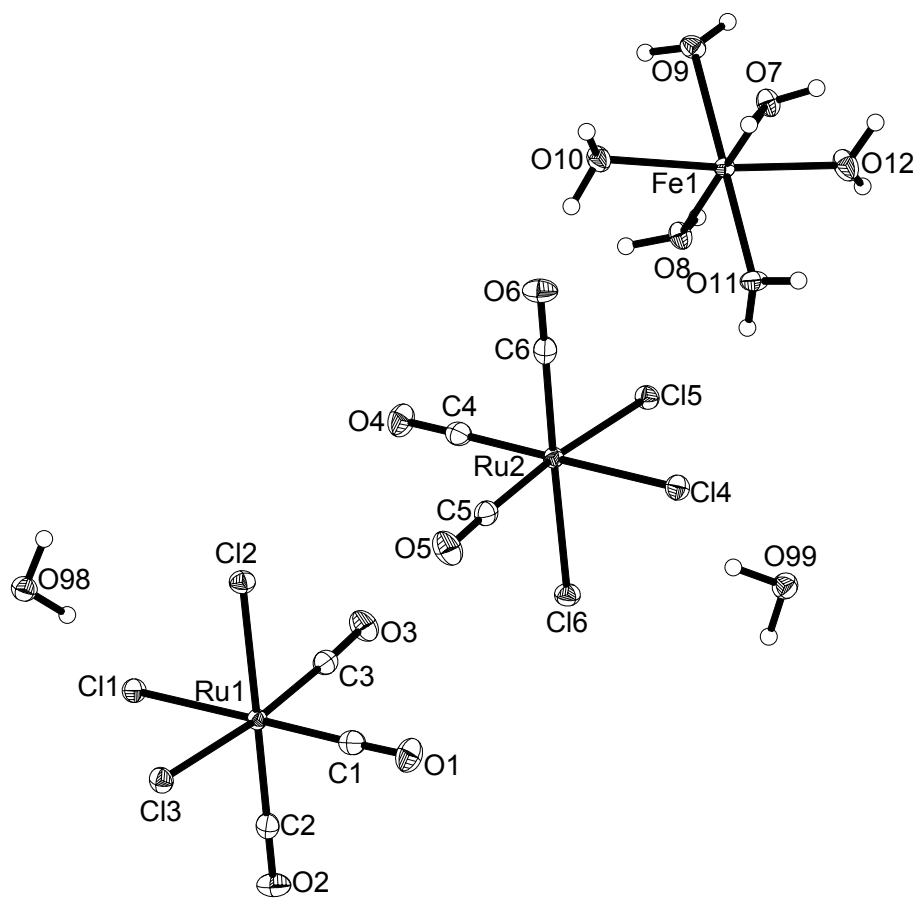

Thermal ellipsoid plot of **1c**.

Figure 3.

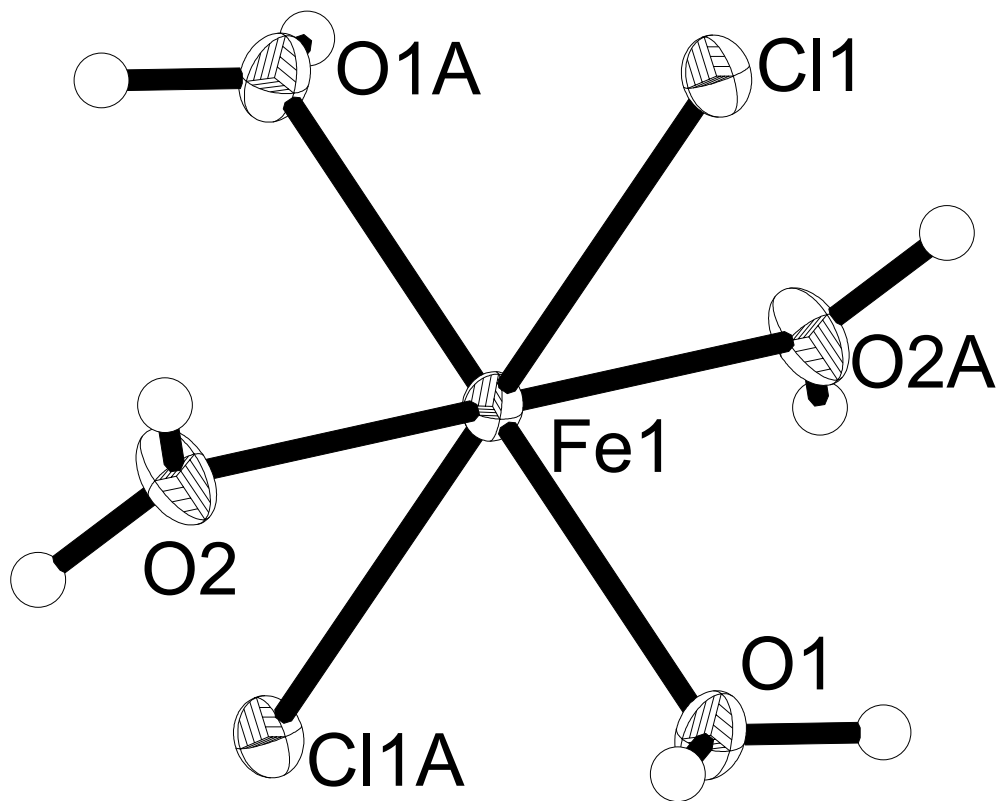

Thermal ellipsoid plot of 2.

Figure 4.

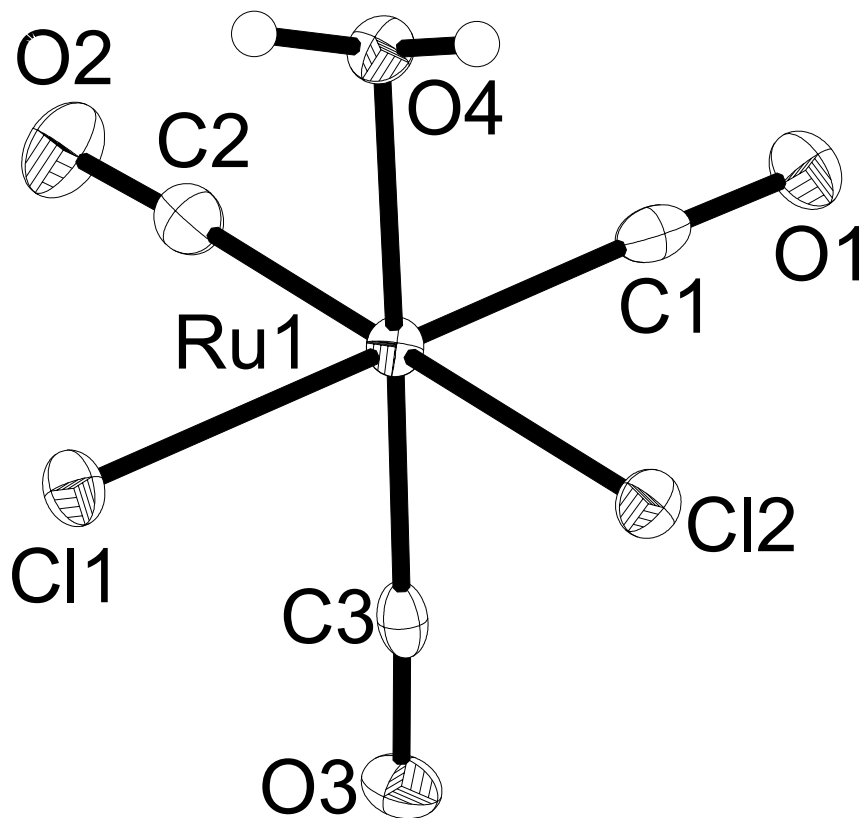

Thermal ellipsoid plot of **3**.
